# Supplementary material
Source: PubMed Central journal article supplement (PMC3117281)

Classical Model

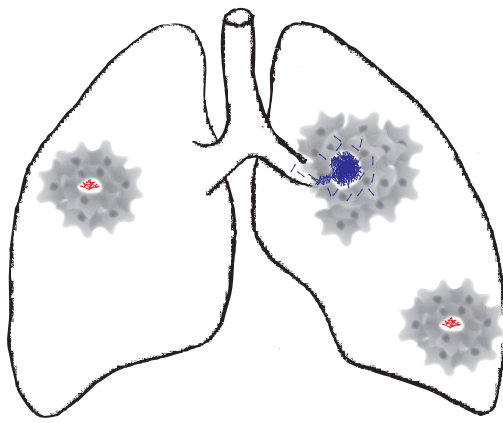

Alternative Model

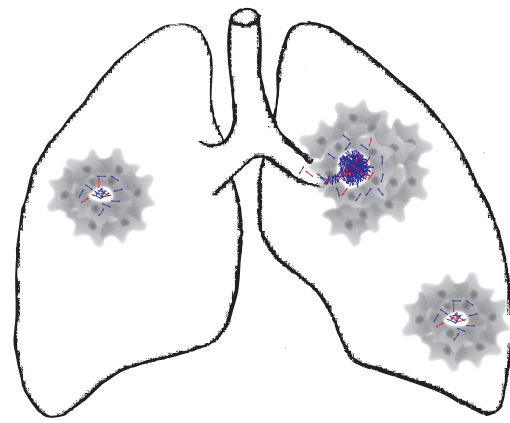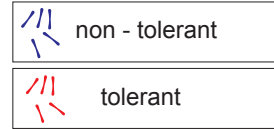

# Supplemental Figure B

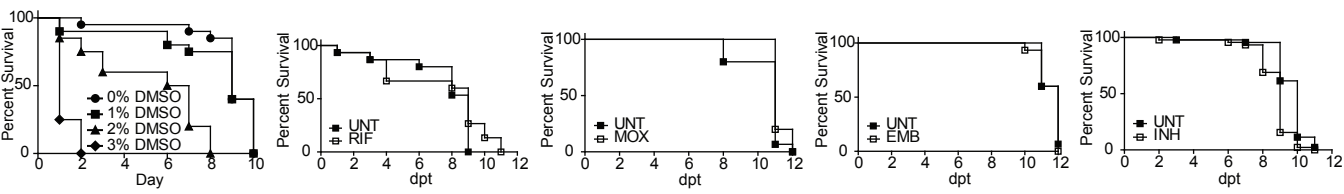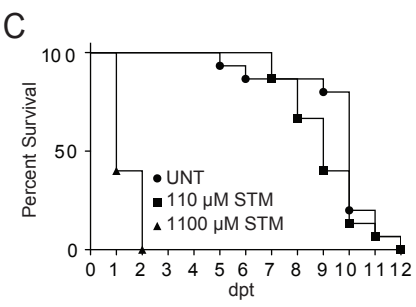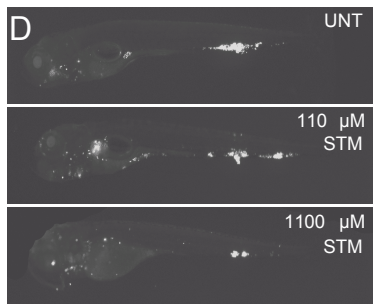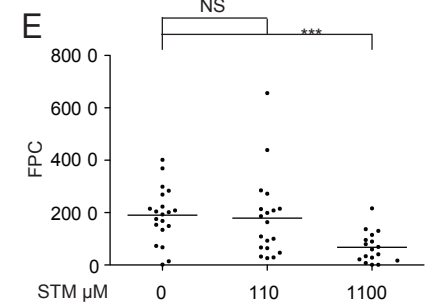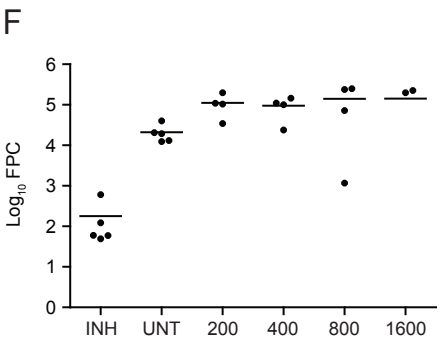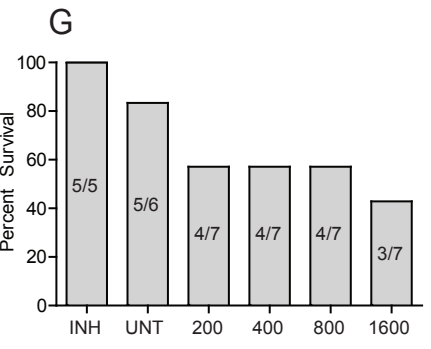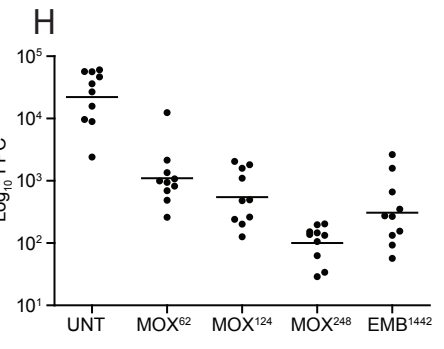

Supplemental Figure

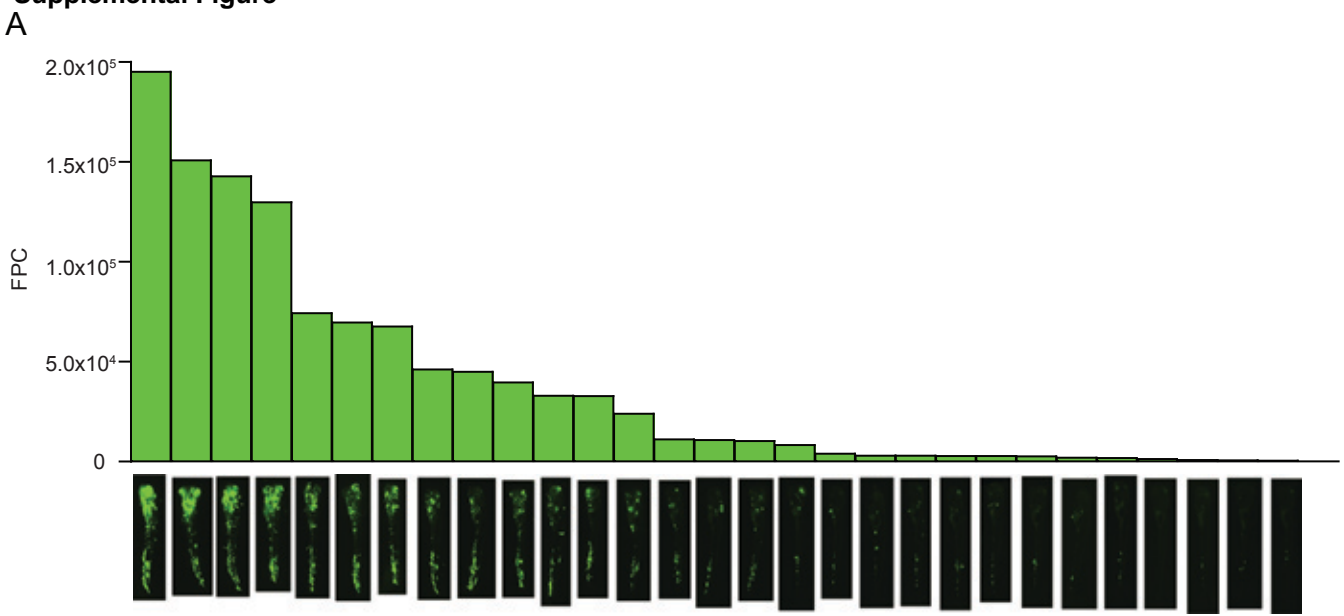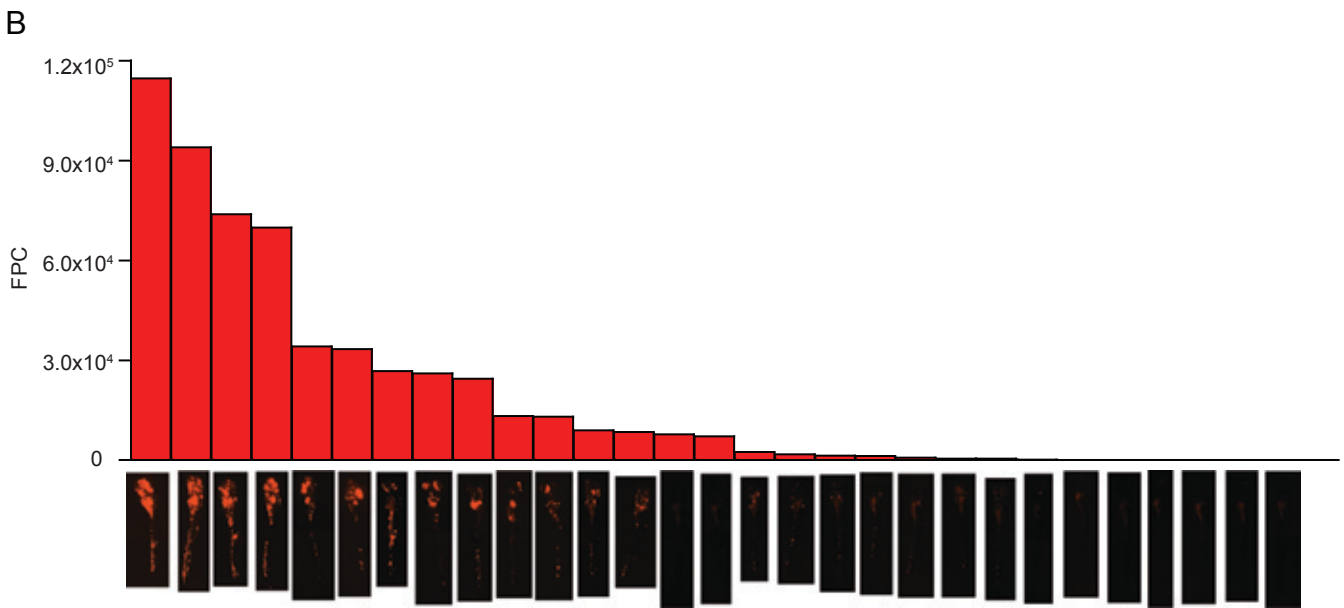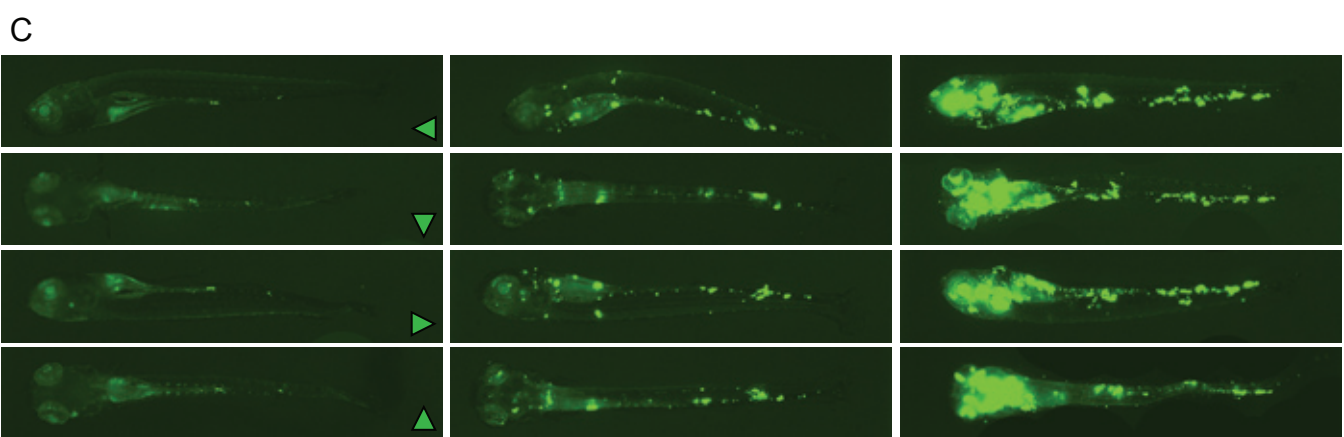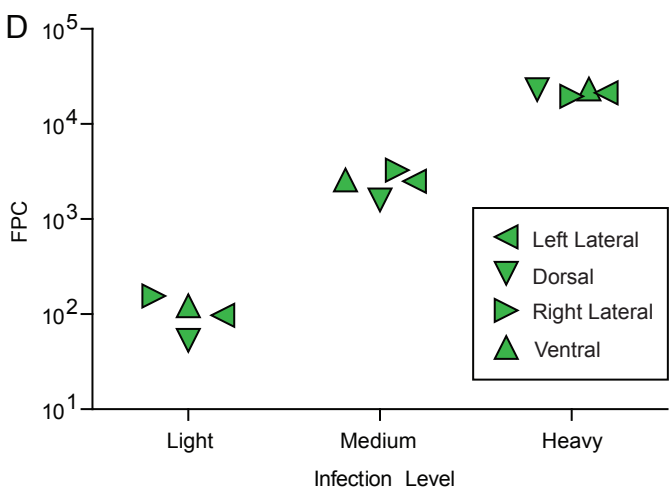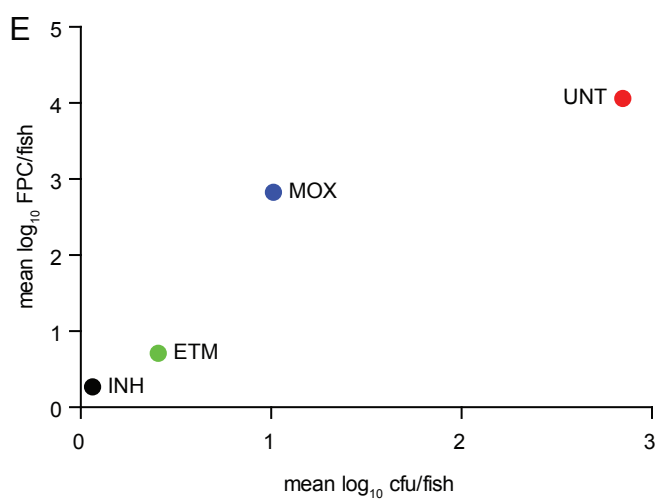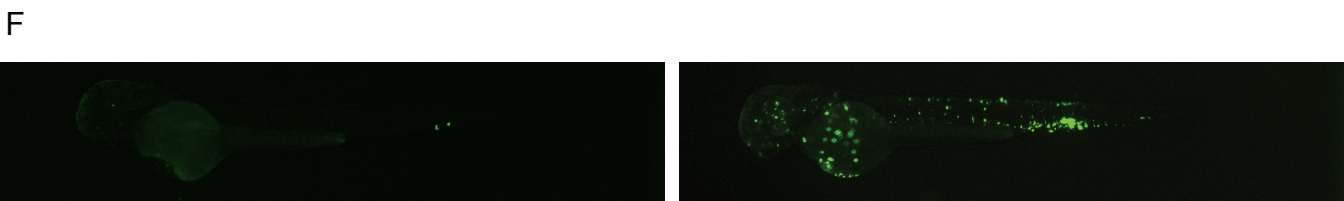

# Supplemental Figure

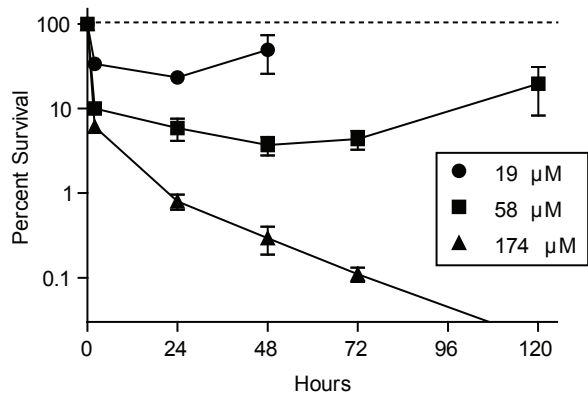

# B

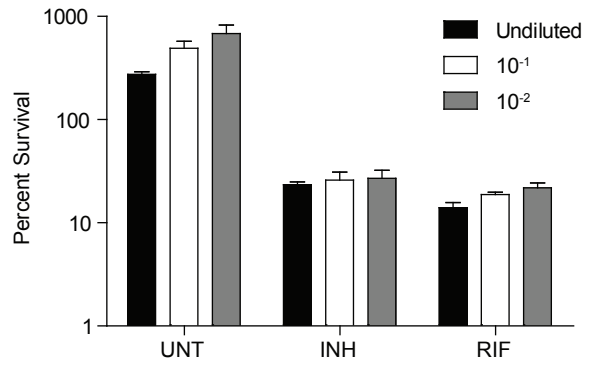

# C

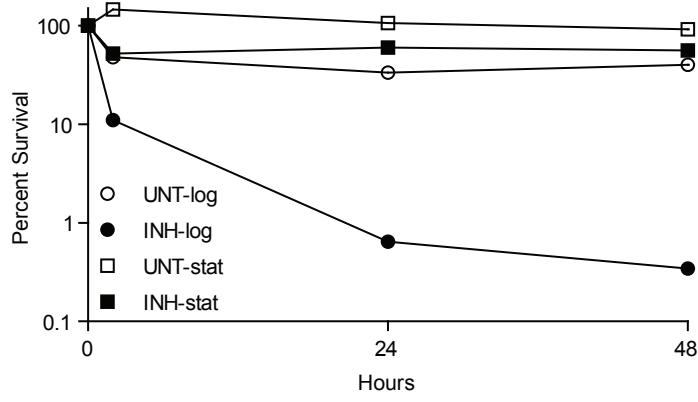

# Supplemental Figure

## A

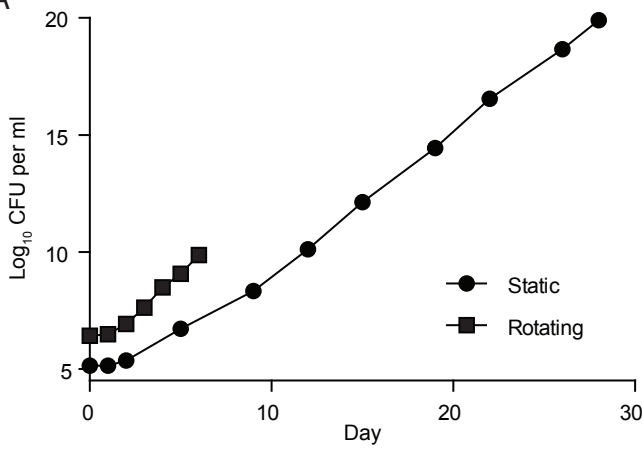

## B

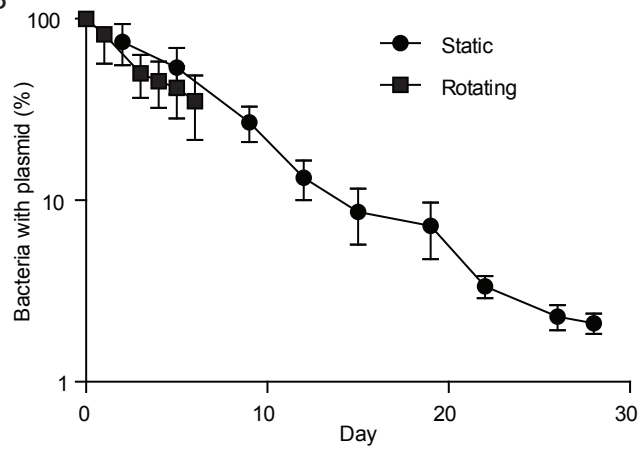

## C

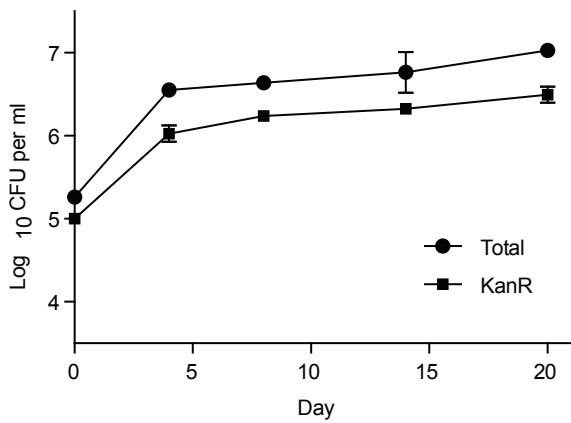

## D

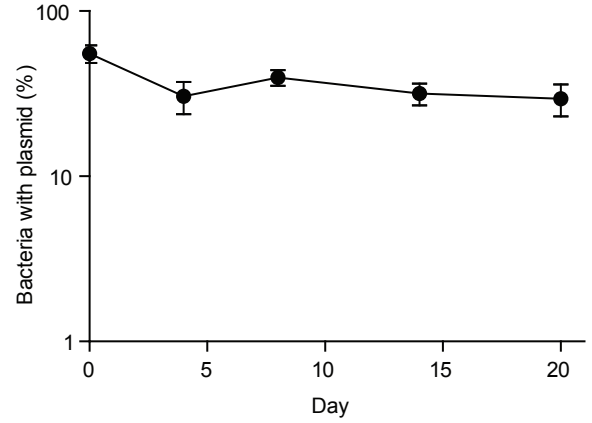

## E

| Cell line | Day | Standard plating   | Plasmid frequency |     | Generation Time |     | Cumulative Bacterial Burden (CBB) |
|-----------|-----|--------------------|-------------------|-----|-----------------|-----|-----------------------------------|
|           |     | CFU/ml             | %                 | r   | $\delta$        | h   | CFU/ml                            |
| THP1      | 0   | $1.28 \times 10^4$ | 100.3             |     |                 |     | $1.28 \times 10^4$                |
|           | 2   | $6.63 \times 10^4$ | 65.3              | 1.9 | 1.1             | 8.8 | $1.37 \times 10^5$                |
|           | 4   | $2.70 \times 10^5$ | 34.9              | 2.8 | 2.2             | 5.9 | $9.46 \times 10^5$                |
| J774      | 0   | $2.08 \times 10^4$ | 65.7              |     |                 |     | $2.08 \times 10^4$                |
|           | 2   | $4.97 \times 10^5$ | 45.1              | 1.7 | 0.12            | 9.8 | $5.32 \times 10^5$                |
|           | 4   | $1.83 \times 10^6$ | 20.2              | 3.4 | 2.7             | 4.9 | $5.68 \times 10^6$                |

# Supplemental Figure

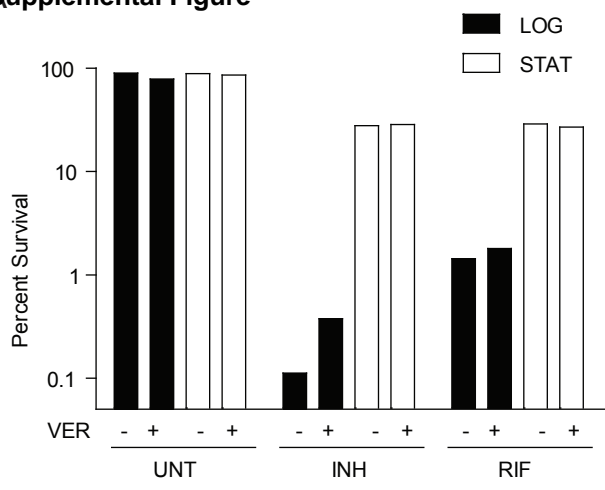

## B

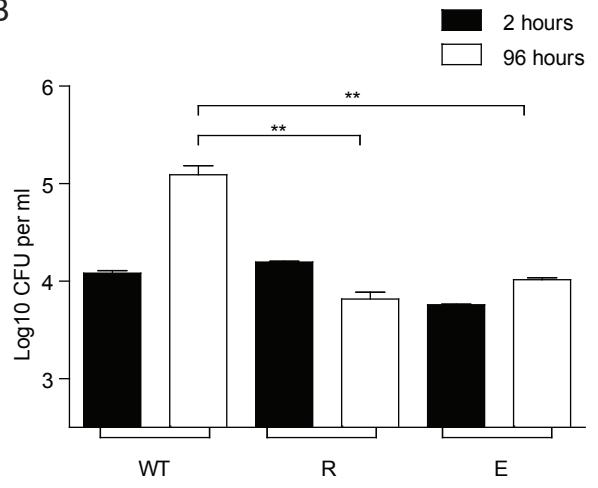

## C

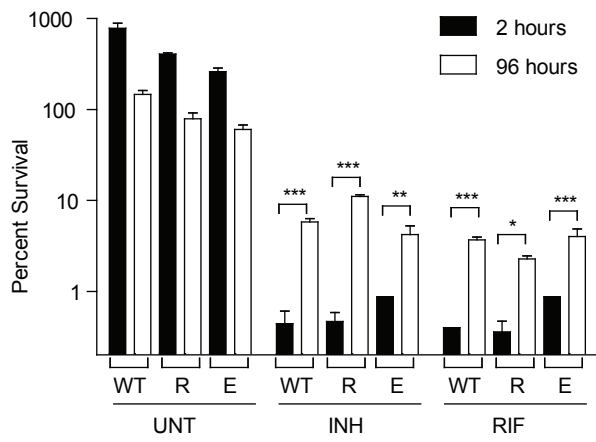

## D

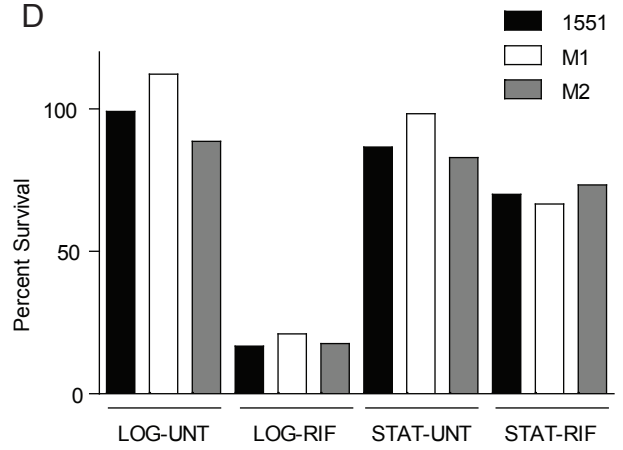

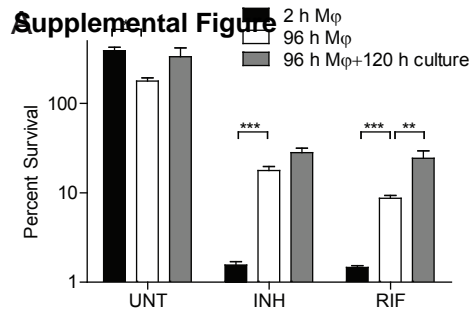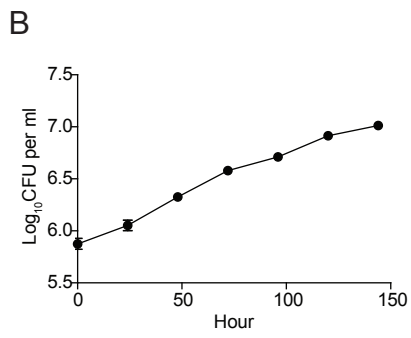

Supplement: NIHMS279384-supplement-02.pdf [file NIHMS279384-supplement-02.pdf]
